# Supplementary material
Source: PubMed Central journal article supplement (PMC4741105)
Supplement: NIHMS745312-supplement-Supplement.pdf [file NIHMS745312-supplement-Supplement.pdf]

## Volatile organic compound conversion by ozone, hydroxyl radicals, and nitrate radicals in residential indoor air: Magnitudes and impacts of oxidant sources

Michael S. Waring and J. Raymond Wells

**Table S1.** Median residential volatile organic compound (VOC) concentrations from Logue et al. (2011); rate constant data from Atkinson and Arey (2003) and Master Chemical Mechanism v3.2 (Bloss et al., 2005; Jenkin et al., 1997, 2003; Saunders et al., 2003); and molar yields for hydroxyl radicals from Weschler and Shields (1996).

| VOC <i>j</i>              | Conc. <i>j</i><br>(ppb) | $k_{j-O_3}$<br>(ppb <sup>-1</sup> h <sup>-1</sup> ) | $k_{j-OH}$<br>(ppb <sup>-1</sup> h <sup>-1</sup> ) | $k_{j-NO_3}$<br>(ppb <sup>-1</sup> h <sup>-1</sup> ) | $Y_{OH,j}$<br>(-) | $k_{j-O_3}C_j$<br>(h <sup>-1</sup> ) | $k_{j-OH}C_j$<br>(h <sup>-1</sup> ) | $k_{j-NO_3}C_j$<br>(h <sup>-1</sup> ) |
|---------------------------|-------------------------|-----------------------------------------------------|----------------------------------------------------|------------------------------------------------------|-------------------|--------------------------------------|-------------------------------------|---------------------------------------|
| 1,1,1-trichloroethane     | 0.055                   | 0                                                   | 3.8E+02                                            | 0                                                    | 0                 | 0                                    | 2.1E+01                             | 0                                     |
| 1,1,2,2-tetrachloroethane | 0.0015                  | 0                                                   | 4.5E+01                                            | 0                                                    | 0                 | 0                                    | 6.6E-02                             | 0                                     |
| 1,1-dichloroethene        | 0.00013                 | 0                                                   | 9.7E+02                                            | 0                                                    | 0                 | 0                                    | 1.2E-01                             | 0                                     |
| 1,2,3-trimethylbenzene    | 0.081                   | 0                                                   | 2.9E+03                                            | 1.7E-01                                              | 0                 | 0                                    | 2.4E+02                             | 1.4E-02                               |
| 1,2,3-trichlorobenzene    | 0.054                   | 0                                                   | 0                                                  | 0                                                    | 0                 | 0                                    | 0                                   | 0                                     |
| 1,2,4-trimethylbenzene    | 0.57                    | 8.9E-07                                             | 2.9E+03                                            | 1.6E-01                                              | 0                 | 5.1E-07                              | 1.6E+03                             | 9.1E-02                               |
| 1,2-dibromoethane         | 0.0013                  | 0                                                   | 2.0E+01                                            | 0                                                    | 0                 | 0                                    | 2.6E-02                             | 0                                     |
| 1,2-dichlorobenzene       | 0.0017                  | 0                                                   | 3.7E+01                                            | 0                                                    | 0                 | 0                                    | 6.2E-02                             | 0                                     |
| 1,2-dichloroethane        | 0.025                   | 0                                                   | 2.1E+01                                            | 0                                                    | 0                 | 0                                    | 5.3E-01                             | 0                                     |
| 1,2-dichloropropane       | 0.0043                  | 0                                                   | 3.9E+01                                            | 0                                                    | 0                 | 0                                    | 1.7E-01                             | 0                                     |
| 1,3,5-trimethylbenzene    | 0.12                    | 0                                                   | 5.0E+03                                            | 7.8E-02                                              | 0                 | 0                                    | 6.1E+02                             | 9.5E-03                               |
| 1,3-butadiene             | 0.072                   | 5.6E-04                                             | 5.9E+03                                            | 9.0E+00                                              | 0.08              | 4.0E-05                              | 4.3E+02                             | 6.5E-01                               |
| 1,3-dichlorobenzene       | 0.025                   | 0                                                   | 6.4E+01                                            | 0                                                    | 0                 | 0                                    | 1.6E+00                             | 0                                     |
| 1,4-dichlorobenzene       | 0.47                    | 0                                                   | 2.8E+01                                            | 0                                                    | 0                 | 0                                    | 1.3E+01                             | 0                                     |
| 2,3-dimethylpentane       | 0.17                    | 0                                                   | 0                                                  | 0                                                    | 0                 | 0                                    | 0                                   | 0                                     |
| 2,4-dimethylpentane       | 0.15                    | 0                                                   | 4.2E+02                                            | 1.3E-02                                              | 0                 | 0                                    | 6.2E+01                             | 1.9E-03                               |
| 2-butoxyethanol           | 0.30                    | 0                                                   | 2.0E+03                                            | 4.1E-01                                              | 0                 | 0                                    | 6.1E+02                             | 1.2E-01                               |
| 2-carene                  | 0.0054                  | 2.0E-02                                             | 7.1E+03                                            | 1.7E+03                                              | 0.85              | 1.1E-04                              | 3.8E+01                             | 9.1E+00                               |
| 2-ethoxyethanol           | 0.017                   | 0                                                   | 1.6E+03                                            | 2.5E-01                                              | 0                 | 0                                    | 2.8E+01                             | 4.3E-03                               |
| 2-ethyltoluene            | 0.10                    | 0                                                   | 1.1E+03                                            | 6.3E-02                                              | 0                 | 0                                    | 1.1E+02                             | 6.4E-03                               |
| 2-methoxyethanol          | 0.039                   | 0                                                   | 1.1E+03                                            | 1.4E-01                                              | 0                 | 0                                    | 4.2E+01                             | 5.2E-03                               |
| 2-methylhexane            | 0.44                    | 0                                                   | 6.1E+02                                            | 0                                                    | 0                 | 0                                    | 2.7E+02                             | 0                                     |
| 2-methylpentane           | 0.45                    | 0                                                   | 4.7E+02                                            | 1.6E-02                                              | 0                 | 0                                    | 2.1E+02                             | 7.2E-03                               |
| 2-propanol                | 1.3                     | 0                                                   | 4.5E+02                                            | 1.2E-01                                              | 0                 | 0                                    | 6.1E+02                             | 1.7E-01                               |
| 3-carene                  | 0.66                    | 3.3E-03                                             | 7.8E+03                                            | 8.1E+02                                              | 0.85              | 2.2E-03                              | 5.2E+03                             | 5.4E+02                               |
| 3-ethyltoluene            | 0.13                    | 0                                                   | 1.6E+03                                            | 4.0E-02                                              | 0                 | 0                                    | 2.2E+02                             | 5.4E-03                               |
| 4-ethyltoluene            | 0.20                    | 0                                                   | 1.0E+03                                            | 7.6E-02                                              | 0                 | 0                                    | 2.1E+02                             | 1.5E-02                               |
| acetaldehyde              | 7.2                     | 0                                                   | 1.3E+03                                            | 2.4E-01                                              | 0                 | 0                                    | 9.6E+03                             | 1.7E+00                               |
| acetic acid               | 3.8                     | 0                                                   | 7.1E+01                                            | 0                                                    | 0                 | 0                                    | 2.7E+02                             | 0                                     |
| acetone                   | 8.8                     | 0                                                   | 1.5E+01                                            | 2.7E-03                                              | 0                 | 0                                    | 1.4E+02                             | 2.4E-02                               |
| acrolein                  | 0.37                    | 2.6E-05                                             | 1.8E+03                                            | 2.8E-01                                              | 0                 | 9.4E-06                              | 6.5E+02                             | 1.0E-01                               |
| acrylonitrile             | 0.028                   | 0                                                   | 3.6E+02                                            | 0                                                    | 0                 | 0                                    | 1.0E+01                             | 0                                     |
| a-pinene                  | 2.2                     | 7.7E-03                                             | 4.6E+03                                            | 5.5E+02                                              | 0.85              | 1.7E-02                              | 1.0E+04                             | 1.2E+03                               |
| benzaldehyde              | 0.67                    | 0                                                   | 1.1E+03                                            | 2.1E-01                                              | 0                 | 0                                    | 7.3E+02                             | 1.4E-01                               |
| benzene                   | 0.66                    | 8.9E-07                                             | 1.1E+02                                            | 2.7E-03                                              | 0                 | 5.8E-07                              | 7.1E+01                             | 1.7E-03                               |
| b-pinene                  | 0.22                    | 1.3E-03                                             | 6.8E+03                                            | 2.2E+02                                              | 0.35              | 2.9E-04                              | 1.5E+03                             | 4.8E+01                               |
| bromodichloromethane      | 0.030                   | 0                                                   | 0                                                  | 0                                                    | 0                 | 0                                    | 0                                   | 0                                     |
| butanal                   | 0.41                    | 0                                                   | 2.1E+03                                            | 9.8E-01                                              | 0                 | 0                                    | 8.6E+02                             | 4.0E-01                               |
| 2-butanol                 | 18                      | 0                                                   | 7.7E+02                                            | 1.9E-01                                              | 0                 | 0                                    | 1.4E+04                             | 3.4E+00                               |
| butylbenzene              | 0.015                   | 0                                                   | 0                                                  | 0                                                    | 0                 | 0                                    | 0                                   | 0                                     |
| carbon disulfide          | 0.042                   | 0                                                   | 2.6E+02                                            | 0                                                    | 0                 | 0                                    | 1.1E+01                             | 0                                     |

|                         |        |         |         |         |      |         |         |         |
|-------------------------|--------|---------|---------|---------|------|---------|---------|---------|
| carbon tetrachloride    | 0.091  | 0       | 1.1E-02 | 0       | 0    | 0       | 9.6E-04 | 0       |
| chlorobenzene           | 0.030  | 0       | 6.8E+01 | 0       | 0    | 0       | 2.1E+00 | 0       |
| chloroform              | 0.19   | 0       | 9.2E+00 | 0       | 0    | 0       | 1.7E+00 | 0       |
| chloromethane           | 0.24   | 0       | 3.8E+00 | 0       | 0    | 0       | 9.3E-01 | 0       |
| crotonaldehyde          | 0.16   | 1.4E-04 | 3.0E+03 | 5.3E-01 | 0.2  | 2.2E-05 | 4.7E+02 | 8.4E-02 |
| cycloheptane            | 0.12   | 0       | 1.1E+03 | 0       | 0    | 0       | 1.4E+02 | 0       |
| cyclohexane             | 0.46   | 0       | 6.2E+02 | 1.2E-02 | 0    | 0       | 2.9E+02 | 5.8E-03 |
| decanal                 | 0.14   | 0       | 0       | 2.0E+00 | 0    | 0       | 0       | 2.8E-01 |
| decane                  | 0.65   | 0       | 1.0E+03 | 2.5E-02 | 0    | 0       | 6.5E+02 | 1.6E-02 |
| dibromochloromethane    | 0.0094 | 0       | 0       | 0       | 0    | 0       | 0       | 0       |
| dichlorofluoromethane   | 0.78   | 0       | 2.7E+00 | 0       | 0    | 0       | 2.1E+00 | 0       |
| d-limonene              | 2.5    | 1.8E-02 | 1.5E+04 | 1.1E+03 | 0.86 | 4.5E-02 | 3.7E+04 | 2.7E+03 |
| dodecane                | 0.36   | 0       | 1.2E+03 | 0       | 0    | 0       | 4.3E+02 | 0       |
| ethanol                 | 85     | 0       | 2.8E+02 | 1.8E-01 | 0    | 0       | 2.4E+04 | 1.5E+01 |
| ethylacetate            | 0.28   | 0       | 1.5E+02 | 0       | 0    | 0       | 4.1E+01 | 0       |
| ethylbenzene            | 0.35   | 0       | 6.2E+02 | 1.1E-02 | 0    | 0       | 2.1E+02 | 3.7E-03 |
| ethylcyclohexane        | 0.33   | 0       | 0       | 0       | 0    | 0       | 0       | 0       |
| formaldehyde            | 19     | 0       | 7.9E+02 | 4.9E-02 | 0    | 0       | 1.5E+04 | 9.2E-01 |
| freon 11                | 0.52   | 0       | 0       | 0       | 0    | 0       | 0       | 0       |
| freon 113               | 0.065  | 0       | 0       | 0       | 0    | 0       | 0       | 0       |
| glyoxal                 | 1.1    | 0       | 9.2E+02 | 2.4E-01 | 0    | 0       | 1.0E+03 | 2.6E-01 |
| heptane                 | 0.61   | 0       | 6.1E+02 | 1.3E-02 | 0    | 0       | 3.8E+02 | 8.2E-03 |
| hexanal                 | 2.1    | 0       | 2.6E+03 | 8.3E-01 | 0    | 0       | 5.3E+03 | 1.7E+00 |
| hexane                  | 0.85   | 0       | 4.7E+02 | 9.8E-03 | 0    | 0       | 4.0E+02 | 8.3E-03 |
| isobutane               | 9.7    | 0       | 1.9E+02 | 0       | 0    | 0       | 1.9E+03 | 0       |
| isooctane               | 0.13   | 0       | 3.3E+02 | 0       | 0    | 0       | 4.2E+01 | 0       |
| isoprene                | 0.72   | 1.1E-03 | 8.9E+03 | 6.2E+01 | 0.27 | 8.1E-04 | 6.4E+03 | 4.4E+01 |
| isopropylbenzene        | 0.016  | 0       | 5.6E+02 | 1.2E-02 | 0    | 0       | 9.1E+00 | 2.0E-04 |
| isovaleraldehyde        | 0.28   | 0       | 2.6E+03 | 2.4E-01 | 0    | 0       | 7.2E+02 | 6.7E-02 |
| methyl ethyl ketone     | 1.2    | 0       | 9.8E+01 | 0       | 0    | 0       | 1.1E+02 | 0       |
| methyl methacrylate     | 0.0012 | 0       | 2.3E+03 | 0       | 0    | 0       | 2.8E+00 | 0       |
| methylcyclohexane       | 0.42   | 0       | 8.5E+02 | 0       | 0    | 0       | 3.6E+02 | 0       |
| methylcyclopentane      | 0.23   | 0       | 0       | 0       | 0    | 0       | 0       | 0       |
| methylene chloride      | 0.32   | 0       | 1.3E+01 | 0       | 0    | 0       | 4.2E+00 | 0       |
| methylglyoxal           | 0.92   | 0       | 1.2E+03 | 2.4E-01 | 0    | 0       | 1.1E+03 | 2.2E-01 |
| methyl isobutyl ketone  | 0.073  | 0       | 1.3E+03 | 0.0E+00 | 0    | 0       | 9.2E+01 | 0.0E+00 |
| methyl tert-butyl ether | 1.7    | 0       | 2.6E+02 | 5.7E-02 | 0    | 0       | 4.3E+02 | 9.4E-02 |
| nonane                  | 0.27   | 0       | 8.7E+02 | 2.0E-02 | 0    | 0       | 2.3E+02 | 5.4E-03 |
| octane                  | 0.21   | 0       | 7.5E+02 | 1.7E-02 | 0    | 0       | 1.6E+02 | 3.6E-03 |
| pentanal                | 0.51   | 0       | 2.5E+03 | 7.9E-01 | 0    | 0       | 1.3E+03 | 4.0E-01 |
| propanal                | 0.76   | 0       | 1.7E+03 | 5.7E-01 | 0    | 0       | 1.3E+03 | 4.3E-01 |
| propylbenzene           | 0.10   | 0       | 5.1E+02 | 1.2E-02 | 0    | 0       | 5.2E+01 | 1.3E-03 |
| styrene                 | 0.16   | 1.5E-03 | 5.1E+03 | 1.3E+02 | 0.37 | 2.5E-04 | 8.5E+02 | 2.2E+01 |
| tetrachloroethene       | 0.21   | 0       | 0       | 0       | 0    | 0       | 0       | 0       |
| toluene                 | 4.8    | 0       | 5.1E+02 | 6.2E-03 | 0    | 0       | 2.5E+03 | 3.0E-02 |
| trichloroethene         | 0.093  | 0       | 1.8E+02 | 0       | 0    | 0       | 1.6E+01 | 0       |
| tridecane               | 0.23   | 0       | 1.3E+03 | 0       | 0    | 0       | 3.0E+02 | 0       |
| undecane                | 0.63   | 0       | 1.1E+03 | 0       | 0    | 0       | 7.0E+02 | 0       |
| xylene, o               | 0.30   | 0       | 1.2E+03 | 3.6E-02 | 0    | 0       | 3.6E+02 | 1.1E-02 |
| xylene, m/p             | 0.99   | 8.9E-07 | 1.6E+03 | 3.2E-02 | 0    | 8.8E-07 | 1.6E+03 | 3.1E-02 |

**Sum = 6.6E-02 1.5E+05 4.5E+03**

**Table S2.** Actual regression coefficients of natural log-transformed inputs regressed against the natural log-transformed outcome variables. See main text for variable and set definitions.

| Outcome <sup>a</sup>                                                     | Set | $\lambda$ | $C_{O_3,out}$ | $\beta_{O_3}$ | $C_{NO,out}$ | $C_{NO_2,out}$ | $\beta_{NO_2}$ | $J_{HONO}$ | $C_{lim}$ | $E_{NOY/V}$ | y-int | $R^2$ |
|--------------------------------------------------------------------------|-----|-----------|---------------|---------------|--------------|----------------|----------------|------------|-----------|-------------|-------|-------|
| Regression Coefficients for Oxidant Concentrations for R2 and R4         |     |           |               |               |              |                |                |            |           |             |       |       |
| $C_{O_3}$                                                                | R2  | 0.79      | 1.2           | -0.65         | -0.16        | -0.077         | -0.0017        | -0.0076    | -0.061    | 0           | -1.4  | 0.92  |
|                                                                          | R4  | 1.8       | 1.6           | -0.32         | -0.12        | -0.039         | -0.019         | -0.0056    | -0.024    | -0.95       | -0.70 | 0.95  |
| $C_{OH}$                                                                 | R2  | 0.61      | 0.99          | -0.58         | -0.10        | -0.010         | 0.090          | 0.090      | 0.23      | 0           | -16   | 0.92  |
|                                                                          | R4  | 0.30      | 0.74          | -0.21         | -0.050       | -0.0057        | 0.28           | 0.44       | -0.00061  | -0.13       | -14   | 0.72  |
| $C_{NO_3}$                                                               | R2  | 1.4       | 1.3           | -0.72         | -0.082       | 0.65           | -0.59          | -0.012     | -0.76     | 0           | -16   | 0.87  |
|                                                                          | R4  | 2.6       | 2.3           | -0.44         | -0.20        | 0.092          | -0.62          | -0.010     | -0.36     | -1.1        | -15   | 0.92  |
| Regression Coefficients for VOC Oxidation Rates by Oxidant for R2 and R4 |     |           |               |               |              |                |                |            |           |             |       |       |
| VOC-ox( $O_3$ )                                                          | R2  | 0.79      | 1.2           | -0.65         | -0.16        | -0.077         | -0.0032        | -0.0073    | 0.82      | 0           | -5.0  | 0.93  |
|                                                                          | R4  | 1.8       | 1.6           | -0.32         | -0.12        | -0.040         | -0.020         | -0.0054    | 0.85      | -0.95       | -4.3  | 1.0   |
| VOC-ox(OH)                                                               | R2  | 0.61      | 0.99          | -0.58         | -0.10        | -0.011         | 0.086          | 0.090      | 0.77      | 0           | -4.4  | 0.94  |
|                                                                          | R4  | 0.30      | 0.74          | -0.20         | -0.050       | -0.0063        | 0.27           | 0.44       | 0.54      | -0.13       | -2.9  | 0.77  |
| VOC-ox( $NO_3$ )                                                         | R2  | 1.4       | 1.3           | -0.72         | -0.082       | 0.65           | -0.59          | -0.012     | 0.065     | 0           | -8.2  | 0.86  |
|                                                                          | R4  | 2.6       | 2.3           | -0.44         | -0.20        | 0.091          | -0.62          | -0.0093    | 0.47      | -1.1        | -7.4  | 0.92  |

<sup>a</sup> Concentrations are units of ppb, oxidation rates in units of ppb/h
